# Supplementary material for: A paradigm shift in the detection of bloodborne pathogens: conventional approaches to recent detection techniques
Source: PubMed Central journal article supplement (PMC11579516; doi:10.17179/excli2024-7392), 2024-10-17
Supplement: EXCLI-23-1245-s-001.pdf [file EXCLI-23-1245-s-001.pdf]

## Supplementary information to:

### Review article:

# A PARADIGM SHIFT IN THE DETECTION OF BLOODBORNE PATHOGENS: CONVENTIONAL APPROACHES TO RECENT DETECTION TECHNIQUES

Sonali Khanal<sup>1</sup> , Manjusha Pillai<sup>1</sup> , Deblina Biswas<sup>2</sup> , Muhammad Torequl Islam<sup>3,4,5</sup> , Rachna Verma<sup>6,7,\*</sup> , Kamil Kuca<sup>7,8,9</sup> , Dinesh Kumar<sup>1</sup> , Asim Najmi<sup>10</sup> , Khalid Zoghebi<sup>10</sup> , Asaad Khalid<sup>11,\*</sup> , Syam Mohan<sup>12,13</sup> 

<sup>1</sup> School of Bioengineering and Food Technology, Shoolini University of Biotechnology and Management Sciences, Solan 173229, India

<sup>2</sup> Instrumentation and Control Engineering, Dr. B. R. Ambedkar National Institute of Technology Jalandhar, Punjab, 144011, India

<sup>3</sup> Department of Pharmacy, Bangabandhu Sheikh Mujibur Rahman Science and Technology University, Gopalganj 8100, Bangladesh

<sup>4</sup> Department of Pharmacy, Bangabandhu Sheikh Mujibur Rahman Science and Technology University, Gopalganj 8100, Bangladesh

<sup>5</sup> Bioinformatics and Drug Innovation Laboratory, BioLuster Research Center Ltd., Gopalganj 8100, Bangladesh

<sup>6</sup> School of Biological and Environmental Sciences, Shoolini University of Biotechnology and Management Sciences, Solan 173229, India

<sup>7</sup> Faculty of Science, University of Hradec Kralove, Rokitanskeho 62, 500 03 Hradec Kralove, Czech Republic

<sup>8</sup> Biomedical Research Center, University Hospital Hradec Kralove, 50003 Hradec Kralove, Czech Republic

<sup>9</sup> Center for Advanced Innovation Technologies, VSB-Technical University of Ostrava, 70800, Ostrava-Poruba, Czech Republic

<sup>10</sup> Department of Pharmaceutical Chemistry and Pharmacognosy, College of Pharmacy, Jazan University, Jazan 45142, Saudi Arabia

<sup>11</sup> Health Research Center, Jazan University, P. O. Box 114, Jazan, 82511, Saudi Arabia

<sup>12</sup> Center for Global Health Research, Saveetha Medical College and Hospitals, Saveetha Institute of Medical and Technical Sciences, Saveetha University, India

<sup>13</sup> School of Health Sciences, University of Petroleum and Energy Studies, Dehradun, Uttarakhand, India

\* **Corresponding authors:** Rachna Verma, School of Biological and Environmental Sciences, Shoolini University of Biotechnology and Management Sciences, Solan 173229, India. Tel.: +91 98162 91543, E-mail: [rachnac83@gmail.com](mailto:rachnac83@gmail.com)  
Asaad Khalid, Health Research Center, Jazan University, P. O. Box 114, Jazan, 82511, Saudi Arabia. E-mail: [drasaad@gmail.com](mailto:drasaad@gmail.com)

<https://dx.doi.org/10.17179/excli2024-7392>

This is an Open Access article distributed under the terms of the Creative Commons Attribution License (<http://creativecommons.org/licenses/by/4.0/>).

**Supplementary Table 1:** Common human bloodborne pathogens and the diseases they cause

| Class     | Bloodborne pathogens                                                                                                                                                                                                                                                                                                                                                                                                      | Diseases caused                                                                                                                                                                                                                                                                                                                                                                     |
|-----------|---------------------------------------------------------------------------------------------------------------------------------------------------------------------------------------------------------------------------------------------------------------------------------------------------------------------------------------------------------------------------------------------------------------------------|-------------------------------------------------------------------------------------------------------------------------------------------------------------------------------------------------------------------------------------------------------------------------------------------------------------------------------------------------------------------------------------|
| Viruses   | <ul style="list-style-type: none"> <li>Human Cytomegalovirus- HHV5</li> <li>Human Immunodeficiency Virus</li> <li>Hepatitis B</li> <li>Hepatitis C</li> <li>Hepatitis A</li> <li>West Nile Virus</li> <li>Dengue Virus</li> <li>Epstein-Barr virus (EBV)</li> </ul>                                                                                                                                                       | <ul style="list-style-type: none"> <li>Infectious mononucleosis</li> <li>Acquired Immunodeficiency syndrome</li> <li>Chronic liver infection</li> <li>Chronic liver infection</li> <li>Contagious liver infection</li> <li>Encephalitis, meningitis, or meningoencephalitis</li> <li>Dengue fever</li> <li>Mononucleosis</li> </ul>                                                 |
| Fungus    | <ul style="list-style-type: none"> <li><i>Candida albicans</i></li> <li><i>Candida parapsilosis</i></li> <li><i>Candida glabrata</i></li> <li><i>Cryptococcus</i></li> <li><i>Histoplasma</i></li> <li><i>Aspergillus species</i></li> </ul>                                                                                                                                                                              | <ul style="list-style-type: none"> <li>Candidiasis</li> <li>Sepsis and tissue infections</li> <li>Urogenital tract infections</li> <li>Cryptococcosis</li> <li>Histoplasmosis</li> <li>Aspergillosis</li> </ul>                                                                                                                                                                     |
| Bacteria  | <ul style="list-style-type: none"> <li><i>Staphylococcus aureus</i> (Gram +)</li> <li><i>Staphylococcus epidermidis</i> (Gram +)</li> <li><i>Escherichia coli</i> (Gram -)</li> <li><b>Enterococcus faecalis</b></li> <li><b>Enterococcus faecium</b></li> <li><b>Streptococcus pneumoniae</b></li> <li><b>Haemophilus influenzae</b></li> <li><b>Acinetobacter baumannii</b></li> <li><b>Brucella abortus</b></li> </ul> | <ul style="list-style-type: none"> <li>Prosthetic joint infections and valve endocarditis</li> <li>Sepsis, neonatal meningitis, urinal tract infections</li> <li>Bacteremia and Endocarditis</li> <li>Intra-abdominal infection and endocarditis</li> <li>Pneumococcal disease</li> <li>Meningitis and Bacteremia</li> <li>Pneumonia and bacteremia</li> <li>Brucellosis</li> </ul> |
| Parasites | <ul style="list-style-type: none"> <li><i>Babesia microti</i> &amp; <i>Babesia divergens</i></li> <li><i>Trypanosoma cruzi</i></li> <li><i>Leishmania donovani</i></li> <li><i>Plasmodium berghei</i></li> <li><i>Treponema pallidum</i></li> </ul>                                                                                                                                                                       | <ul style="list-style-type: none"> <li>Babesiosis</li> <li>Chagas disease</li> <li>Leishmaniasis</li> <li>Malaria</li> <li>Syphilis</li> </ul>                                                                                                                                                                                                                                      |

**Supplementary Table 2:** Classification of bloodborne pathogens prevalent in food animals

| Food Animals | Blood parasites                                                                                                                                                                                                             | Virus                            | Bacteria                                                                                                                       | Fungus                                                          |
|--------------|-----------------------------------------------------------------------------------------------------------------------------------------------------------------------------------------------------------------------------|----------------------------------|--------------------------------------------------------------------------------------------------------------------------------|-----------------------------------------------------------------|
| Goat         | <i>Theileria hirci</i><br><i>Theileria ovis</i><br><i>Theileria separata</i><br><i>Eperythrozoon ovis</i><br><b>Babesia ovis</b><br><b>Anaplasma ovis</b>                                                                   | Rift Viral Fever                 | <i>Ehrlichia ruminantium</i><br><b>Anaplasma marginale</b><br>COXIELLA BURNETII                                                | <i>Aspergillus sp.</i><br><i>Candida sp.</i>                    |
| Sheep        | <i>Theileria hirci</i><br><i>Theileria ovis</i><br><i>Theileria separata</i><br><i>Eperythrozoon ovis</i><br><i>Babesia motasi</i><br><i>Anaplasma ovis</i>                                                                 | Rift Viral Fever                 | <i>Anaplasma phagocytophilum</i>                                                                                               | <i>Aspergillus sp.</i><br><i>Candida sp.</i>                    |
| Cattle       | <i>Theileria annulate</i><br><i>Theileria sp</i><br><i>Eperythrozoon wenyoni</i><br><i>Babesia bigemina</i>                                                                                                                 | Bovine leukosis virus            | <i>Haemotrophic mycoplasma</i><br><i>Anaplasma marginale</i><br><i>Anaplasma centrale</i>                                      | <b>Trichophyton verrucosum</b>                                  |
| Chicken      | <i>Leucocytozoon caulleryi</i><br><i>Leucocytozoon sabrazezi</i> ,<br><i>Leucocytozoon schoutedeni</i><br><i>Plasmodium gallinaceum</i> ,<br><i>Plasmodium juxtannucleare</i><br><i>Plasmodium durae</i><br><i>Isospora</i> | Avian influenza                  | <i>Aegyptianella pullorum</i>                                                                                                  | <i>Cryptococcus neoformans</i><br><i>Histoplasma capsulatum</i> |
| Pig          | <b>Babesia trautmanni</b><br><b>Babesia perroncitoi</b><br><b>Eperythrozoon suis</b><br><b>Eperythrozoon parvum.</b><br><b>Trypanosoma spp</b><br><b>Anaplasma spp</b>                                                      | African swine fever virus        | <i>Brucella suis</i>                                                                                                           | <i>Aspergillus sp.</i>                                          |
| Fish         | HAEMOGREGARINA BIGEMINA<br><i>Cryptobia</i><br><i>Trypanosoma</i>                                                                                                                                                           | Cyprinid herpesvirus-3 (CyHV-3), | <i>Aeromonas spp.</i> ,<br><i>Mycobacterium</i> ,<br><i>Salmonella spp.</i> , <i>Streptococcus spp.</i> ,<br><i>Vibrio spp</i> | <i>Branchiomysces sanguinis</i><br><i>Ichthyophonus hoferi</i>  |
